# Supplementary material
Source: Elsevier journal article supplement (https://www.sciencedirect.com/science/article/pii/S0300893225014101)

## **MATERIAL ADICIONAL**

**Figura 1 del material adicional.** Abordaje del tratamiento puente en pacientes bajo tratamiento antiagregante. i.v.: intravenoso. <sup>a</sup> Iniciar cangrelor a dosis de 0,75 mcg/kg/min. <sup>b</sup> Iniciar tirofibán a dosis de 0,1 mcg/kg/min (o si aclaramiento de creatinina [ClCr] < 50 ml/min, 0,05 mcg/kg/min) o eptifibatida a dosis de 2 mcg/kg/min (si ClCr < 50 ml/min, ajustar a 1 mcg/kg/min). <sup>c</sup> Dosis de carga de clopidogrel (300-600 mg v.o., o reiniciar cangrelor si la administración oral no es posible). Adaptado de Sullivan AE, et al. J Am Coll Cardiol. 2021;78:1550-1563.

**Tabla 1 del material adicional. Estratificación del riesgo hemorrágico según el tipo de cirugía/procedimiento**

| <b>Riesgo hemorrágico</b> | <b>Bajo</b>                                                                                                                                                                                                                                                                                                      | <b>Moderado</b>                                                                                                                                                                                                                                   | <b>Alto</b>                                                                                                                                                                                                                                                                                                                 |
|---------------------------|------------------------------------------------------------------------------------------------------------------------------------------------------------------------------------------------------------------------------------------------------------------------------------------------------------------|---------------------------------------------------------------------------------------------------------------------------------------------------------------------------------------------------------------------------------------------------|-----------------------------------------------------------------------------------------------------------------------------------------------------------------------------------------------------------------------------------------------------------------------------------------------------------------------------|
| Anestesiología            | <ul style="list-style-type: none"> <li>• Infiltración local<sup>a</sup></li> <li>• Bloqueos fasciales: ilioinguinal, iliohipogástrico, transverso del abdomen, fascia lata<sup>c</sup></li> <li>• Bloqueos superficiales<sup>c</sup>: bloqueos a nivel del antebrazo, digitales, safeno a nivel de la</li> </ul> | <ul style="list-style-type: none"> <li>• Bloqueos profundos<sup>c</sup>: plexo celiaco, ganglio estrellado, proximal de plexo ciático, obturador, infraclavicular, supraclavicular</li> <li>• Bloqueos superficiales perivasculares NO</li> </ul> | <ul style="list-style-type: none"> <li>• Anestesia neuroaxial<sup>e</sup>: espinal, epidural, catéter epidural</li> <li>• Anestesia ocular: retrobulbar</li> <li>• Bloqueos paravertebrales: paravertebral, plexo lumbar, plexo cervical profundo</li> <li>• Prueba y colocación de neuroestimuladores espinales</li> </ul> |

- rodilla, bloqueos nerviosos en tobillo
- Bloqueos superficiales perivasculares compresibles<sup>c</sup>: poplíteo, femoral, axilar
  - Anestesia ocular: tópica y peribulbar<sup>a</sup>
  - Infiltraciones articulares o musculoesqueléticas
  - Infiltraciones en punto gatillo
  - Infiltraciones sacroiliacas

- compresibles<sup>c</sup>: intercostal, interescalénico
- Infiltración epidural con corticoides (interlaminar, transforaminal)
  - Bloqueo nervioso o ablación facetaria por radiofrecuencia
  - Procedimientos intradisco
  - Bloqueos simpáticos
  - Implante de estimuladores de nervio periférico

- Colocación de catéteres y bombas intratecales
- Vertebroplastia y cifoplastia<sup>d</sup>
- Epiduroscopia, descompresión epidural

#### Angiología y cirugía vascular

- Arterial:
  - Cirugía endovascular MMII, sector infrainguinal (femoropoplíteo), con introductor de hasta 6 F
  - Amputaciones menores
- Venoso:
  - Safenectomía ± microflebectomías
  - Termoablación vena safena
- Otros:
  - Acceso vascular para HD (FAV) nativas o con prótesis, no terciarias

- Arterial:
  - Cirugía endovascular MMII sector infrainguinal (femoropoplíteo), con introductor superior a 6 F
  - Cirugía endovascular MMII sector aortoiliaco
  - Cirugía abierta MMII sector infrainguinal (vena o prótesis) y BP extraanatómicos (femorofemoral, axilofemoral)
  - Isquemia aguda de MMSS
  - Cirugía endovascular de:
    1. Isquemia mesentérica, aguda o crónica

- Arterial:
  - Cirugía abierta MMII, sector aortoiliaco
  - Cirugía abierta de:
    1. Isquemia mesentérica, aguda o crónica
    2. Aneurismas viscerales
    3. Aneurismas o estenosis renal.
    4. Enfermedad carotídea, vertebral o subclavia
    5. Aneurismas de aorta torácica, abdominal o toracoabdominal
    6. Síndrome aórtico agudo
- Venoso:

---

2. Aneurismas viscerales ---

3. Aneurismas o estenosis renal

4. Enfermedad carotídea, vertebral o subclavia

5. Aneurismas de aorta torácica, abdominal o toracoabdominal

6. Síndrome aórtico agudo

○ Amputaciones mayores

• Venoso:

○ Síndromes congestivos pélvicos

• Otros:

○ Acceso vascular para HD (FAV) complejo o terciario

• Otros:

○ Síndrome del desfiladero torácico

○ Traumatismos vasculares

---

Cardiología  
intervencionista<sup>d</sup>

- Procedimientos coronarios
  - Coronariografía diagnóstica transradial o transfemoral<sup>a</sup>
  - ICP transradial<sup>a</sup>
  - ICP transfemoral
- Intervencionismo estructural
  - Cierre de defectos septales interauriculares
- Estudios electrofisiológicos y ablaciones

- Intervencionismo estructural
  - Implante de válvula aórtica transcáteter
  - Implante de válvula mitral transcáteter
  - Valvuloplastia aórtica<sup>b</sup>
  - Valvuloplastia mitral<sup>b</sup>
  - Terapia borde a borde mitral<sup>b</sup>
  - Intervencionismo percutáneo sobre la válvula tricúspide<sup>b</sup>
  - Cierre percutáneo orejuela<sup>b</sup>

- Estudio electrofisiológico diagnóstico<sup>a</sup>
- Ablación de TSV<sup>a</sup>
- Ablación endocárdica de TV
- Ablación de fibrilación auricular con aislamiento de venas pulmonares<sup>a</sup>
- Ablación de *flutter* auricular\*
- Dispositivos
  - Implante transvenoso de MCP, DAI, CRT<sup>a</sup>
  - Implante Holter subcutáneo<sup>a</sup>
  - Recambio de generador MCP, DAI, CRT<sup>a</sup>
- Otros
  - Cateterismo cardiaco derecho
  - Marcapasos transitorio

- Cierre *leak* paravalvular aórtico<sup>b</sup>
- Cierre *leak* paravalvular mitral
- Cierre de comunicación interventricular
- Ablaciones
  - Ablación epicárdica de TV
- Dispositivos
  - Extracción de electrodo (mecánica o asistida por láser)
  - Implante de MCP sin cables
- Otros
  - Dispositivos de asistencia ventricular
  - Pericardiocentesis<sup>b</sup>
  - Biopsia endomiocárdica

Cirugía cardiovascular

- Implante de MCP, DAI, CRT<sup>a</sup>
- Explante simple de electrodos de MCP, DAI, CRT<sup>a</sup>
- Recambio de generador de MCP, DAI, CRT<sup>a</sup>
- CRC (con o sin circulación extracorpórea)
- Cirugía valvular aislada mitral/aórtica/tricuspídea
- Cirugía aislada de aorta ascendente
- Cirugía cardiaca mayor emergente (código 0)
- Cirugía complicaciones mecánicas IAM
- Cirugía valvular múltiple
- Cirugía del síndrome aórtico agudo

|                                                |                                                                                                                                                                                                                                                                      |                                                                                                                                                                                                                                                                                                                           |                                                                                                                                                                                                                                                                                                                                                                                                                                                                                                                                                                                                                                                                                                                                                 |
|------------------------------------------------|----------------------------------------------------------------------------------------------------------------------------------------------------------------------------------------------------------------------------------------------------------------------|---------------------------------------------------------------------------------------------------------------------------------------------------------------------------------------------------------------------------------------------------------------------------------------------------------------------------|-------------------------------------------------------------------------------------------------------------------------------------------------------------------------------------------------------------------------------------------------------------------------------------------------------------------------------------------------------------------------------------------------------------------------------------------------------------------------------------------------------------------------------------------------------------------------------------------------------------------------------------------------------------------------------------------------------------------------------------------------|
|                                                |                                                                                                                                                                                                                                                                      | <ul style="list-style-type: none"> <li>• Cirugía de la MHO</li> <li>• Tumores cardiacos benignos</li> <li>• Cierre de CIA</li> <li>• Balón de contrapulsación intraaórtico</li> <li>• Pericardiocentesis</li> <li>• Ventana pericárdica subxifoidea/toracotomía</li> <li>• Implante de ECMO VV o VA periférica</li> </ul> | <ul style="list-style-type: none"> <li>• Cirugía de raíz de aorta/arco torácico</li> <li>• Cirugía cardiopatías congénitas (excepto cierre de CIA aislada)</li> <li>• Cirugía de la endocarditis</li> <li>• Cirugía cardiaca mayor en reintervención</li> <li>• Pericardiectomía</li> <li>• Cirugía combinada valvular + coronaria</li> <li>• Tromboendarterectomía pulmonar</li> <li>• Trasplante cardiaco/cardiopulmonar</li> <li>• Implante de dispositivos de asistencia ventricular o ECMO central</li> <li>• Implante de prótesis transcatóter (transfemorales, transapical, transaxilar)</li> <li>• Ablación epicárdica aislada de la FA</li> <li>• Explante complejo de electrodos de MCP, DAI, TRC (vainas mecánicas/láser)</li> </ul> |
| <p>Cirugía general y del aparato digestivo</p> | <ul style="list-style-type: none"> <li>• Cirugía menor piel y tejido subcutáneo (lipomas) bajo anestesia local</li> <li>• Drenaje abscesos superficiales</li> <li>• PAAF de tumores o quistes mamarios</li> <li>• Punción aspirativa de ganglio linfático</li> </ul> | <ul style="list-style-type: none"> <li>• Colectomía laparoscópica</li> <li>• Biopsia ganglionar</li> <li>• Cirugía pared abdominal (hernia inguinal, umbilical y epigástrica)</li> <li>• Cirugía proctológica: hemorroides, fístula y fisura de ano</li> <li>• Cirugía endocrina: hemitiroidectomía,</li> </ul>           | <ul style="list-style-type: none"> <li>• Cirugía mayor abdominal oncológica: esofagectomía, gastrectomía, resección colorrectal, hepatectomía, pancreatectomía, linfadenectomías</li> <li>• Resección intestinal</li> <li>• Cirugía mayor abdominal o pélvica de más de 45 minutos de duración</li> <li>• Cirugía gastrointestinal con anastomosis (incluye bariátrica)</li> </ul>                                                                                                                                                                                                                                                                                                                                                              |

---

paratiroidectomía, extirpación quiste tirogloso

- Cirugía bariátrica laparoscópica (tubulización gástrica)
- Cirugía mamaria: tumorectomía, ganglio centinela, biopsia escisional
- Drenaje percutáneo de abscesos intraabdominales o pélvicos

---

Cirugía plástica y reconstructiva

- Biopsias escisionales<sup>a</sup>
- Tumores cutáneos menores con injertos y colgajos locales

- Heridas crónicas: pie diabético, úlceras vasculares y por presión
- Cirugía estética facial: blefaroplastia, rinoplastia, otoplastia y otros procedimientos menores
- Cirugía de la mano

- Amputaciones
  - Cirugía de los sarcomas musculoesqueléticos
  - Cirugía del cáncer de cabeza y cuello
  - Cirugía del plexo braquial
  - Cirugía estética de contorno corporal
  - Cirugía estética de rejuvenecimiento facial
  - Cirugía genital y de reasignación de sexo
  - Cirugía mayor de los tumores cutáneos
  - Cirugía traumatología facial
  - Linfadenectomías cervical, axilar e inguinal
  - Malformaciones vasculares y linfáticas
  - Quemados
  - Reimplantes y revascularizaciones
  - Cirugía estética de la mama
-

|                      |                                                                                                                                                                                                                                                                                                                                                                                            |    |    |                                                                                                                                                                                                                                                                                                                                                                                                              |
|----------------------|--------------------------------------------------------------------------------------------------------------------------------------------------------------------------------------------------------------------------------------------------------------------------------------------------------------------------------------------------------------------------------------------|----|----|--------------------------------------------------------------------------------------------------------------------------------------------------------------------------------------------------------------------------------------------------------------------------------------------------------------------------------------------------------------------------------------------------------------|
|                      |                                                                                                                                                                                                                                                                                                                                                                                            |    |    | <ul style="list-style-type: none"> <li>• Cirugía reconstructiva mayor de tronco y extremidades</li> <li>• Microcirugía en general</li> </ul>                                                                                                                                                                                                                                                                 |
| Cirugía torácica     | <ul style="list-style-type: none"> <li>• Simpatectomía hiperhidrosis</li> </ul>                                                                                                                                                                                                                                                                                                            | en | la | <ul style="list-style-type: none"> <li>• Cirugía pulmonar (lobectomía, neumectomía, traumatismos, malformaciones, decorticación)</li> <li>• Cirugía de la pared torácica, tráquea y bronquios (malformaciones, traumatismos, tumores)</li> <li>• Cirugía de la pleura: biopsia pleural, tumores</li> <li>• Cirugía de mediastino, estrecho superior del tórax y diafragma, incluida esofagectomía</li> </ul> |
| Endoscopia digestiva | <ul style="list-style-type: none"> <li>• Diagnóstico (EGD, colonoscopia, sigmoidoscopia flexible), incluyendo biopsia de la mucosa<sup>a</sup></li> <li>• CPRE con colocación de <i>stent</i> (biliar o pancreático) o dilatación papilar de balón sin esfinterotomía</li> <li>• Enteroscopia de pulsión</li> <li>• Enteroscopia asistida por balón solo con fines diagnósticos</li> </ul> |    |    | <ul style="list-style-type: none"> <li>• Polipectomía &gt; 1 cm</li> <li>• Resección endoscópica mucosa</li> <li>• Disección submucosa endoscópica</li> <li>• CPRE con esfinterotomía biliar o pancreática</li> <li>• Ampulectomía</li> <li>• Colocación de gastrostomía/yeyunostomía endoscópica percutánea</li> </ul>                                                                                      |

- Cápsula endoscópica
- Colocación de prótesis enterales
- Ecoendoscopia sin PAAF
- Electrocoagulación con argón plasma
- Polipectomía < 1 cm

- Colocación de colostomía endoscópica percutánea
- Enteroscopia terapéutica con balón asistido
- Ecoendoscopia con PAAF o biopsia
- Ecoendoscopia intervencionista
- Ablación tumoral
- Tratamiento de varices
- Dilatación neumática o con bujías
- Drenajes por ecografía
- Técnicas de tratamiento de tumores hepáticos por ecografía (radiofrecuencia, alcoholización, etc.)
- Biopsia hepática percutánea o transyugular
- Miotomía peroral endoscópica
- Ablación con radiofrecuencia de lesiones esofágicas o gástricas
- Cistogastrostomía
- Ablación con láser

Ginecología y obstetricia

- Histeroscopia diagnóstica y quirúrgica
- Biopsia cervical/Conización
- Drenaje-marsupialización de la glándula de Bartolino
- Tumorectomía mamaria
- Biopsia corial/Amniocentesis
- Legrado obstétrico

- Patología anexial benigna (quistectomía ovárica, salpinguectomía, anexectomía)
- Histerectomía simple (vía laparotómica, laparoscópica o vaginal)
- Cirugía del prolapso genital
- Técnicas antiincontinencia

- Miomectomía laparotómica o laparoscópica
- Cirugía de la endometriosis profunda
- Histerectomía radical
- Vulvectomía radical
- Cirugía de estadificación oncológica
- Linfadenectomía pélvica, paraaórtica e inguinal

|                    |                                                                                                                                                                                                                                                                                                                                                                                                                                                     |                                                                                                                                                                                                                                                                                                                                                                                                                                                                                             |                                                                                                                                                                                                                                                                                                   |
|--------------------|-----------------------------------------------------------------------------------------------------------------------------------------------------------------------------------------------------------------------------------------------------------------------------------------------------------------------------------------------------------------------------------------------------------------------------------------------------|---------------------------------------------------------------------------------------------------------------------------------------------------------------------------------------------------------------------------------------------------------------------------------------------------------------------------------------------------------------------------------------------------------------------------------------------------------------------------------------------|---------------------------------------------------------------------------------------------------------------------------------------------------------------------------------------------------------------------------------------------------------------------------------------------------|
|                    |                                                                                                                                                                                                                                                                                                                                                                                                                                                     | <ul style="list-style-type: none"> <li>• Cuadrantectomía mamaria</li> <li>• Cesárea programada sin factores de riesgo de hemorragia puerperal</li> </ul>                                                                                                                                                                                                                                                                                                                                    | <ul style="list-style-type: none"> <li>• Mastectomía total (con/sin linfadenectomía)</li> <li>• Cesárea urgente</li> <li>• Cesárea programada con factores de riesgo de hemorragia puerperal (placenta previa, preeclampsia grave, gestación múltiple...)</li> <li>• Legrado puerperal</li> </ul> |
| Medicina intensiva | <ul style="list-style-type: none"> <li>• Cateterismo cardiaco derecho</li> <li>• Marcapasos transitorio</li> <li>• Broncoscopia diagnóstica</li> <li>• Lavado broncoalveolar</li> <li>• Toracocentesis con control ecográfico</li> <li>• Inserción de tubo de drenaje pleural con control ecográfico</li> <li>• Paracentesis guiada por ecografía</li> <li>• Colocación y retirada de catéter venoso central</li> <li>• PICC<sup>a</sup></li> </ul> | <ul style="list-style-type: none"> <li>• Balón de contrapulsación intraaórtico</li> <li>• Implante de ECMO VV o VA periférica</li> <li>• Toracocentesis sin control ecográfico</li> <li>• Inserción de tubo de drenaje pleural sin control ecográfico</li> <li>• Paracentesis sin control ecográfico</li> <li>• Traqueotomía percutánea programada</li> <li>• Colocación y retirada de catéter arterial central</li> <li>• Colocación y retirada de catéter venoso de alto flujo</li> </ul> | <ul style="list-style-type: none"> <li>• Cricotomía urgente<sup>b</sup></li> <li>• Pericardiocentesis<sup>b</sup></li> <li>• Punción lumbar<sup>d</sup></li> </ul>                                                                                                                                |

|                                            |                                                                                                                                                                                                                                                                                                                                                    |                                                                                                                                                                                                                                                                                                                                                |                                                                                                                                                                                                                                                                                                                                                                                                                                                        |
|--------------------------------------------|----------------------------------------------------------------------------------------------------------------------------------------------------------------------------------------------------------------------------------------------------------------------------------------------------------------------------------------------------|------------------------------------------------------------------------------------------------------------------------------------------------------------------------------------------------------------------------------------------------------------------------------------------------------------------------------------------------|--------------------------------------------------------------------------------------------------------------------------------------------------------------------------------------------------------------------------------------------------------------------------------------------------------------------------------------------------------------------------------------------------------------------------------------------------------|
| <p>Medicina de urgencias y emergencias</p> | <ul style="list-style-type: none"> <li>• Artrocentesis</li> <li>• Drenaje de absceso subcutáneo</li> <li>• Drenaje pleural con control ecográfico</li> <li>• Inserción de catéter arterial</li> <li>• Inserción de catéter venoso central</li> <li>• Paracentesis guiada por ecografía</li> <li>• Toracocentesis con control ecográfico</li> </ul> | <ul style="list-style-type: none"> <li>• Drenaje pleural sin control ecográfico</li> <li>• Paracentesis NO guiada por ecografía</li> <li>• Toracocentesis sin control ecográfico</li> </ul>                                                                                                                                                    | <ul style="list-style-type: none"> <li>• Punción lumbar</li> </ul>                                                                                                                                                                                                                                                                                                                                                                                     |
| <p>Neumología</p>                          | <ul style="list-style-type: none"> <li>• Broncoscopia diagnóstica</li> <li>• Lavado broncoalveolar</li> <li>• Cepillado bronquial</li> <li>• Toracocentesis con control ecográfico</li> <li>• Catéter pleural tunelizado con control ecográfico</li> <li>• Inserción de tubo de drenaje pleural con control ecográfico</li> </ul>                  | <ul style="list-style-type: none"> <li>• Toracocentesis sin control ecográfico</li> <li>• Catéter pleural tunelizado sin control ecográfico</li> <li>• Inserción de tubo de drenaje pleural sin control ecográfico</li> <li>• Punción aspirativa con aguja fina transtorácica</li> <li>• Ecobroncoscopia con punción transbronquial</li> </ul> | <ul style="list-style-type: none"> <li>• Biopsia endobronquial/transbronquial/criobiopsia</li> <li>• Biopsia con aguja gruesa transtorácica</li> <li>• Resección tumoral láser/electrocoagulación/criorecanalización</li> <li>• Implantación prótesis</li> <li>• Dilatación bronquial/traqueal</li> <li>• Broncoscopia rígida</li> <li>• Extracción cuerpo extraño</li> <li>• Biopsia pleural cerrada/transtorácica</li> <li>• Toracoscopia</li> </ul> |

|                                           |                                                                                                                                                                                                                                                                                                                             |                                                                                                                                                                                                                                                                                                                                                                                                                                                                              |                                                                                                                                                                                                                                                                                                                                                                                                                                                                                                                                                                                                                                                                                                                                      |
|-------------------------------------------|-----------------------------------------------------------------------------------------------------------------------------------------------------------------------------------------------------------------------------------------------------------------------------------------------------------------------------|------------------------------------------------------------------------------------------------------------------------------------------------------------------------------------------------------------------------------------------------------------------------------------------------------------------------------------------------------------------------------------------------------------------------------------------------------------------------------|--------------------------------------------------------------------------------------------------------------------------------------------------------------------------------------------------------------------------------------------------------------------------------------------------------------------------------------------------------------------------------------------------------------------------------------------------------------------------------------------------------------------------------------------------------------------------------------------------------------------------------------------------------------------------------------------------------------------------------------|
| <p>Neurocirugía</p>                       | <p>Cirugía menor bajo anestesia local:</p> <ul style="list-style-type: none"> <li>• Biopsia muscular</li> <li>• Biopsia nervio periférico</li> <li>• Revisión de herida quirúrgica</li> <li>• Angiografía cerebral</li> <li>• Procedimientos percutáneos espinales: facetarias y rizólisis</li> </ul>                       | <p>Procedimientos mínimamente invasivos:</p> <ul style="list-style-type: none"> <li>• <i>Stent</i> carotídeo</li> <li>• Descompresión de nervios periféricos</li> <li>• Acceso percutáneo a trigémino</li> <li>• Cifoplastia/vertebroplastia<sup>d</sup></li> <li>• Punción lumbar<sup>d</sup></li> <li>• Procedimientos percutáneos espinales: epidurales, transforaminales y caudales</li> <li>• Instrumentación espinal percutánea sin acceso al canal espinal</li> </ul> | <p>Procedimientos invasivos:</p> <ul style="list-style-type: none"> <li>• Craneotomía/craniectomía</li> <li>• Biopsias cerebrales o medulares</li> <li>• Cirugía de raquis compleja o con acceso al canal espinal (laminectomía, discectomía, corrección de deformidad, etc.)</li> <li>• Endarterectomía carotídea</li> <li>• Embolizaciones (intracraneal/medular)</li> <li>• Embolectomía mecánica</li> <li>• Estimulación cerebral profunda, electrodos cerebrales profundos.</li> <li>• Derivaciones de LCR (derivación ventriculoperitoneal, ventriculoauricular, lumboperitoneal, drenaje lumbar continuo y drenaje ventricular externo)</li> <li>• Cirugía transesfenoidal y cirugía endoscópica de base de cráneo</li> </ul> |
| <p>Odontología y cirugía maxilofacial</p> | <ul style="list-style-type: none"> <li>• Procedimientos de diagnóstico: <ul style="list-style-type: none"> <li>○ Exploración dental<sup>a</sup></li> <li>○ Exploración periodontal (sondaje)</li> <li>○ Radiografía convencional (panorámica, periapicales, etc.)<sup>a</sup></li> <li>○ Sialografía</li> </ul> </li> </ul> | <ul style="list-style-type: none"> <li>• Procedimientos de cirugía oral o maxilofacial: <ul style="list-style-type: none"> <li>○ Extracciones dentales quirúrgicas extensas/complicadas con probable riesgo de sangrado</li> </ul> </li> </ul>                                                                                                                                                                                                                               | <ul style="list-style-type: none"> <li>• Osteoplastia/Ostectomía por deformidades ortognáticas</li> <li>• Procedimientos quirúrgicos LeFort I/II/III</li> <li>• Tumores de cavidad oral que impliquen disección cervical y</li> </ul>                                                                                                                                                                                                                                                                                                                                                                                                                                                                                                |

- 
- Artograma de la articulación temporomandibular
  - Procedimientos de odontología restauradora<sup>a</sup>: obturaciones (empastes), reconstrucciones, incrustaciones, etc.
  - Procedimientos de prostodoncia<sup>a</sup>: prótesis fija (coronas o puentes) o removible (dentaduras)
  - Procedimientos de prótesis maxilofacial<sup>a</sup>
  - Procedimientos de ortodoncia<sup>a</sup>
  - Procedimientos de endodoncia
    - Tratamiento de conductos<sup>a</sup>
    - Cirugía apical o apicectomías<sup>f</sup>
    - Resecciones radiculares quirúrgicas<sup>f</sup>
  - Procedimientos de cirugía oral o maxilofacial:
    - Extracciones dentarias convencionales
    - Alveoloplastia/ vestibuloplastia/escisión de tejidos blandos<sup>f</sup>
    - Frenectomía<sup>f</sup>
  - Escisión de tumor maligno intraóseo  $\geq 1,25$  cm
  - Suturas complicadas  $> 5$  cm
  - Resección radical de maxilar superior o mandíbula
  - Tumores de cavidad oral sin disección cervical
  - Incisión y drenaje de abscesos intra/extraorales con afectación de múltiples espacios fasciales
  - Reducción de fracturas óseas complicadas con fijación y múltiples accesos quirúrgicos
  - Artroplastia/reconstrucción articulación temporomandibular
  - Traqueotomía de emergencia
  - Procedimientos de periodoncia:
    - Cirugía periodontal extensa/complicada con probable riesgo de sangrado (resectiva, procedimientos reconstructivos mayores)
  - Procedimientos reconstructivos que impliquen colgajos microvascularizados
  - Cirugía oncológica maxilofacial compleja
-

- 
- Cirugía preprotésica<sup>f</sup>
  - Procedimientos de periodoncia:
    - Instrumentación supragingival
    - Instrumentación subgingival
    - Cirugía periodontal poco extensa/complicada con bajo riesgo de sangrado (acceso, resectiva, regenerativa o plástica)<sup>f</sup>
    - Tratamiento no quirúrgico de las enfermedades periimplantarias
    - Cirugía periimplantaria (acceso, resectiva, regenerativa o plástica)
    - poco extensa/complicada con bajo riesgo de sangrado<sup>f</sup>
    - Terapia de mantenimiento periodontal o periimplantario
  - Procedimientos relacionados con la colocación de implantes dentales:
    - Colocación convencional de implantes con/sin regenerativa, mucogingival o plástica)<sup>f</sup>
  - Cirugía periimplantaria extensa/complicada con probable riesgo de sangrado (resectiva, regenerativa, mucogingival o plástica)<sup>f</sup>
  - Procedimientos con implantes dentales:
    - Colocación de implantes múltiples con cirugía extensa/complicada y probable riesgo de sangrado<sup>f</sup>
    - Cirugía de regeneración ósea guiada extensa/complicada con probable riesgo de sangrado, simultánea o diferida a la colocación de los implantes<sup>f</sup>
-

- 
- elevación de colgajo mucoperióstico, poco extensa/complicada con bajo riesgo de sangrado<sup>f</sup>
  - Técnica de regeneración simultánea o diferida a la colocación de los implantes poco extensa/compleja con bajo riesgo de sangrado<sup>f</sup>
  - Segunda fase de cirugía implantológica<sup>f</sup>
  - Cirugía de glándulas salivales:
    - Parotidectomía
    - Submaxilectomía
  - Cirugía cutánea con procedimientos de reconstrucción locales

---

Oftalmología

- Procedimientos con anestesia tópica<sup>a</sup>
  - Cirugía del segmento anterior:
    - Cirugía de catarata mediante facoemulsificación
    - Queratoplastia lamelar
    - Trasplante membrana amniótica
    - Implante de segmentos intraestromales (anillos corneales)
  - Cirugía del segmento anterior:
    - Cirugía extracapsular de catarata
    - Lesiones conjuntivales
    - Pterigion
    - Reconstrucciones de iris y pupiloplastia
    - Implante secundario de lentes intraoculares suturadas o ancladas a iris
  - Cirugía de retina:
    - Endorresección de tumores intraoculares
    - Vitrectomía (en retinopatía diabética proliferativa, tendencia a resangrado posquirúrgico)
  - Cirugía de órbita y anejos oculares:
    - Cirugía de descompresión orbitaria
-

- 
- *Cross-linking* corneal
  - Cirugía refractiva (láser corneal)
  - Cirugía de estrabismo:
    - Inyección toxina botulínica
    - Inyección troclear de corticoides
    - Inyección intramuscular de anestésicos
  - Cirugía de retina:
    - Inyección intravítrea de fármacos
    - Fotocoagulación con láser
    - Cerclaje o indentación escleral
  - Cirugía de órbita y anejos oculares:
    - Cauterización de pestañas
    - Sondaje vía lagrimal con/sin implante
    - Conjuntivoplastia
    - Extirpación/biopsia de lesiones menores palpebrales (tumores, chalación, quiste, etc.)
  - Cirugía de glaucoma
    - Procesos ciclodestructivos
  - Queratoplastia penetrante
  - Cirugía de estrabismo:
    - Cirugía de uno o varios músculos
  - Cirugía de retina:
    - Facovitrectomía
    - Cirugía de membrana epirretiniana
  - Cirugía de órbita y anejos oculares:
    - Cirugía reconstructiva con injertos, colgajos o implantes
    - Malposiciones palpebrales
    - Blefaroplastia, cejaplastia
    - Cirugía vía lagrimal
    - Cirugía orbitaria (tumores, fracturas, etc.)
  - Cirugía de glaucoma:
    - Goniotomía
    - Trabeculectomía
    - Facotrabeculectomía
    - Implante de sistemas de drenaje valvular
    - Implante de dispositivos CGMI

- 
- |                                                         |                                                                                                                                                                                                                                                                                                                                                                                                   |                                                                                                                                                                                                                                                                                                 |                                                                                                                                                                                                                                                                 |
|---------------------------------------------------------|---------------------------------------------------------------------------------------------------------------------------------------------------------------------------------------------------------------------------------------------------------------------------------------------------------------------------------------------------------------------------------------------------|-------------------------------------------------------------------------------------------------------------------------------------------------------------------------------------------------------------------------------------------------------------------------------------------------|-----------------------------------------------------------------------------------------------------------------------------------------------------------------------------------------------------------------------------------------------------------------|
| Otorrinolaringología<br>y cirugía de cabeza<br>y cuello | <ul style="list-style-type: none"> <li>• Tubos ventilatorios transtimpánicos<sup>a</sup></li> <li>• Cirugía membrana timpánica           <ul style="list-style-type: none"> <li>○ Timpanoplastias</li> </ul> </li> <li>• Cirugía oído medio           <ul style="list-style-type: none"> <li>○ Estapedectomía</li> <li>○ <i>Glomus</i> timpánico</li> <li>○ Mastoidectomía</li> </ul> </li> </ul> | <ul style="list-style-type: none"> <li>• Amigdalectomía y adenoidectomía</li> <li>• Faringoplastias</li> <li>• Cirugía del tiroides y paratiroides</li> <li>• Cirugía glándulas salivales</li> <li>• Cervicotomía (biopsia ganglionar)</li> <li>• Drenaje abscesos cervicales/orales</li> </ul> | <ul style="list-style-type: none"> <li>• Cirugía oncológica cavidad oral</li> <li>• Cirugía base cráneo</li> <li>• Cirugía oncológica orofaringe</li> <li>• Cirugía oncológica laringe e hipofaringe</li> <li>• Cirugía oncológica senos paranasales</li> </ul> |
|---------------------------------------------------------|---------------------------------------------------------------------------------------------------------------------------------------------------------------------------------------------------------------------------------------------------------------------------------------------------------------------------------------------------------------------------------------------------|-------------------------------------------------------------------------------------------------------------------------------------------------------------------------------------------------------------------------------------------------------------------------------------------------|-----------------------------------------------------------------------------------------------------------------------------------------------------------------------------------------------------------------------------------------------------------------|
-

- Cirugía oído interno
  - Implantes cocleares
  - Laberintectomía
- Radiofrecuencia cornetes
- Cirugía endoscópica nasosinusal simple (sinusitis, poliposis)
- Cirugía funcional del septo nasal
- Cirugía pirámide nasal estética y funcional
- Otoplastias
- Microcirugía endolaríngea por lesiones benignas (pólipos, quistes, edemas)<sup>a</sup>

- Malformaciones cervicales (fístulas, quistes branquiogénos)
- Traqueotomía

- Vaciamientos ganglionares cervicales
- Cirugía de tumores cutáneos avanzados en cabeza y cuello
- Reconstrucción defectos oncológicos complejos

Radiología vascular e intervencionista

- PAAF<sup>a</sup> o BAG órgano superficial: tiroides, mama, ganglio linfático superficial, parótida, bultomas superficiales
- Punciones terapéuticas en territorio osteoarticular (infiltraciones corticoides, lavado calcio en tendón supraespinoso, inyección de PRFC en tendinitis, aspiración de ganglión), bloqueos e infiltraciones facetarias lumbares
- Recambio de catéter de drenaje (biliar, nefrostomía, absceso), con tracto maduro<sup>a</sup>
- Toracocentesis guiada por ecografía

- Termoablación de osteoma osteoide y metástasis óseas periféricas
- Drenaje pleural<sup>d</sup>
- Drenaje peritoneal<sup>d</sup>
- Biopsia hepática transyugular (se presupone alteración de la función hepática)

- BAG hepática/renal
- BAG intraabdominal, retroperitoneal, en la pared torácica o pulmonar. PAAF en órgano profundo
- Drenaje de absceso
- Termoablación percutánea hepática, renal o pulmonar
- Intervención biliar transhepática (nuevo trayecto) y colecistostomía percutánea
- Intervencionismo arterial: embolizaciones, angioplastia/*stent*, fibrinolisis/trombectomía, endoprótesis

- 
- Paracentesis guiada por ecografía
  - Drenaje de absceso superficial
  - Punciones venosas diagnósticas o terapéuticas: colocación y retirada de filtros cava (técnica estándar), tratamiento percutáneo de varicocele masculino o femenino, colocación y retirada de catéter venoso central tunelizado y no tunelizado (incluido reservorios subcutáneos), toma de muestras venosas, manometrías venosas, esclerosis de malformaciones venosas y linfáticas, etc.
  - CCIP y canalizaciones venosas periféricas<sup>a</sup>
  - Tratamiento con radiofrecuencia o láser de varices en miembros inferiores
  - Arteriografía diagnóstica e intervencionismo arterial: embolizaciones, quimio- y radioembolización, quimioterapia intraarterial, angioplastia/*stent* si requiere acceso < 6 F
  - Linfografía intranodular
  - Fistulografía, angioplastia y trombectomía en accesos vasculares para hemodiálisis<sup>d</sup>
  - Dacriocistografías, sialografías

- aórtica, tratamiento percutáneo del ictus, etc., que requieran acceso  $\geq 7$  F
  - Trombolisis farmacomecánica del TEV (TVP, TEP, trombosis portal y mesentérica)
  - Retirada compleja de filtros cava (técnicas avanzadas)
  - Intervenciones venosas intratorácicas o en SNC
  - DPIT
  - Nefrostomía/Gastrostomía/Catéteres doble J percutáneos: colocación inicial<sup>d</sup>
  - Punción y cateterización de la cisterna del quilo para intervencionismo del conducto torácico
  - Procedimientos espinales: vertebroplastia, cifoplastia, punción lumbar, inyección epidural<sup>d</sup>
  - Infiltraciones y bloqueos en columna cervical
-

- 
- *Stent* en tubo digestivo (colon, esófago, duodeno)<sup>d</sup>

---

Traumatología y  
cirugía ortopédica

- Punción articular o artrocentesis<sup>a</sup>
  - Artroscopia rodilla (incluyendo plastias de ligamentos cruzados)
  - Artroscopia cadera
  - Artroscopia hombro (descompresión subacromial, reparación de manguito rotador)
  - Cirugía de la inestabilidad del hombro (artroscopia y abierta)
  - Cirugía del tobillo (incluyendo osteosíntesis)
  - Cirugía del antepié (deformidades y fracturas)
  - Cirugía ortopédica del retropié
  - Cirugía de las fracturas de los huesos del tarso
  - Cirugía de la mano/pie (partes blandas, lesiones tumorales benignas y tendinosas)
  - Cirugía de las lesiones traumáticas de los tendones de muñeca y mano
  - Cirugía de la fractura de cadera (prótesis parcial/total y osteosíntesis)<sup>g</sup>
  - Artroplastia primaria de cadera
  - Artroplastia primaria de rodilla
  - Cirugía de la fractura de fémur (diafisaria y distal)
  - Cirugía de la fractura de la tibia (proximal y diafisaria)
  - Cirugía de la fractura del húmero (proximal y diafisaria)
  - Artroplastia del hombro
  - Cirugía de la columna cervical
  - Artrodesis de la columna lumbar (hasta 2 niveles abierta y procedimientos mínimamente invasivos [XLIF, FLIT, etc.])
  - Cirugía ortopédica oncológica (tumores de partes blandas)
  - Artroplastia de cadera bilateral
  - Artroplastia de rodilla bilateral
  - Revisiones de artroplastia de cadera
  - Revisiones de artroplastia de rodilla
  - Cirugía de la columna lumbar (artrodesis circunferencial mayor de 2 niveles abierta)
  - Cirugía de las deformidades raquídeas (escoliosis)
  - Cirugía de la fractura de la pelvis y sacro
  - Politraumatizados
  - Cirugía ortopédica oncológica (resección de tumores óseos con reconstrucción)
-

- Cirugía de las lesiones compresivas de los nervios periféricos del miembro superior
- Cirugía de la fractura del radio distal y diáfisis de huesos del antebrazo
- Cirugía de las fracturas articulares del codo
- Cirugía de partes blandas del codo

- |          |                                                                                                                                                                                                                                                             |                                                                                                                                                                                                                       |                                                                                                                                                                  |
|----------|-------------------------------------------------------------------------------------------------------------------------------------------------------------------------------------------------------------------------------------------------------------|-----------------------------------------------------------------------------------------------------------------------------------------------------------------------------------------------------------------------|------------------------------------------------------------------------------------------------------------------------------------------------------------------|
| Urología | <ul style="list-style-type: none"> <li>• Cirugías genitales externos masculinos</li> <li>• Cirugía incontinencia urinaria femenina</li> <li>• Cirugía endoscópica retrógrada litiasis ureteral</li> <li>• Cistoscopia y derivaciones retrógradas</li> </ul> | <ul style="list-style-type: none"> <li>• Cirugía percutánea renal</li> <li>• Cirugía endoscópica vejiga/próstata</li> <li>• Biopsia de próstata</li> <li>• Cirugía reconstructiva uretral y retroperitoneo</li> </ul> | <ul style="list-style-type: none"> <li>• Cirugía exéretica urológica (oncológica y no oncológica)</li> <li>• Trasplante renal</li> <li>• Donante vivo</li> </ul> |
|          | <hr/>                                                                                                                                                                                                                                                       |                                                                                                                                                                                                                       |                                                                                                                                                                  |

- |       |                                                                                                                |                                                                            |
|-------|----------------------------------------------------------------------------------------------------------------|----------------------------------------------------------------------------|
| Otros | <ul style="list-style-type: none"> <li>• Aspirado de médula ósea</li> <li>• Inyección intramuscular</li> </ul> | <ul style="list-style-type: none"> <li>• Biopsia de médula ósea</li> </ul> |
|-------|----------------------------------------------------------------------------------------------------------------|----------------------------------------------------------------------------|

BAG: biopsia con aguja gruesa; BP: *bypass*; CCIP: catéter central de inserción periférica; CGMI: cirugía de glaucoma mínimamente invasiva; CIA: comunicación interauricular; CPRE: colangiopancreatografía retrógrada endoscópica; CRC: cirugía de revascularización coronaria; DAI: desfibrilador automático implantable; DPIT: derivación portosistémica intrahepática transyugular; ECMO VA o VV: oxigenador extracorpóreo de membrana venoarterial o venovenosa; EGD: endoscopia gastroduodenal; FA: fibrilación auricular; FAV: fístula arteriovenosa; FLIT: fusión lumbar intersomática transforaminal; HD: hemodiálisis; IAM: infarto agudo

de miocardio; ICP: intervención coronaria percutánea; LCR: líquido cefalorraquídeo; MCP: marcapasos; MHO: miocardiopatía hipertrófica obstructiva; MMII: miembros inferiores; MMSS: miembros superiores; PAAF: punción aspirativa con aguja fina; PRFC: plasma rico en factores de crecimiento; SNC: sistema nervioso central; TEP: tromboembolia pulmonar; TEV: tromboembolia venosa; TRC: terapia de resincronización cardíaca; TSV: taquicardia supraventricular; TV: taquicardia ventricular; TVP: trombosis venosa profunda; XLIF: fusión lumbar intersomática lateral extrema.

<sup>a</sup> Procedimientos de mínimo riesgo de sangrado.

<sup>b</sup> El riesgo de sangrado de estos procedimientos se considera intermedio, aunque debido a la potencial gravedad de la hemorragia pueden manejarse de igual manera que los procedimientos de alto riesgo hemorrágico.

<sup>c</sup> El riesgo de cualquier bloqueo superficial o profundo con un catéter se convierte en alto.

<sup>d</sup> El riesgo de determinados procedimientos percutáneos es muy dependiente de la experiencia del operador (por ejemplo, TAVI), por lo que se podría plantear (siempre individualizando) la posibilidad de reducir la categoría de riesgo de un procedimiento (en consecuencia, variaría el abordaje del mismo) según los resultados locales.

<sup>e</sup> El uso de aspirina no contraindica la realización de técnicas neuroaxiales.

<sup>f</sup> Procedimientos que pueden verse afectados por el cuadro clínico sistémico del paciente o por la ubicación, y los medios profesionales con los que se trabaja en una consulta dental estándar. En estos procedimientos, será fundamental la implementación de medidas hemostáticas locales. Además, debe tenerse en cuenta que, por realizarse de manera ambulatoria, puede incrementarse la complicación en el abordaje del sangrado.

<sup>g</sup> A pesar del riesgo hemorrágico de la intervención, se recomienda realizar la cirugía en las 24-48 horas siguientes al ingreso, adaptando los bloqueos nerviosos periféricos y el tipo de anestesia (neuroaxial o general) a las condiciones hemostáticas.

**Tabla 3 del material adicional.** Test de función plaquetar disponibles.

| Test de función plaquetar     | Puntos de corte            |                          |
|-------------------------------|----------------------------|--------------------------|
|                               | Alta reactividad plaquetar | Baja actividad plaquetar |
| VerifyNow P2Y <sub>12</sub> * | 208 URP                    | 85 URP                   |
| Multiplate Analyzer*          | 46 U                       | 18 U                     |
| VASP                          | 50% IRP                    | 16% IRP                  |
| TEG                           | 47 mm                      | 31 mm                    |
| LTA 5 mM ADP                  | 46% MAP                    | ND                       |
| LTA 20 mM ADP                 | 59% MAP                    | ND                       |

ADP: adenosín difosfato; IRP: índice de reactividad plaquetaria; LTA: agregometría por transmisión de luz; MAP: máxima agregación plaquetaria; ND: no disponible; TEG: tromboelastografía; URP: unidades de reactividad plaquetaria; VASP: *vasodilator-stimulated phosphoprotein*.

\*Test disponibles *point-of-care*.

Adaptado de Angiolillo et al.<sup>30</sup>.

FIG.1

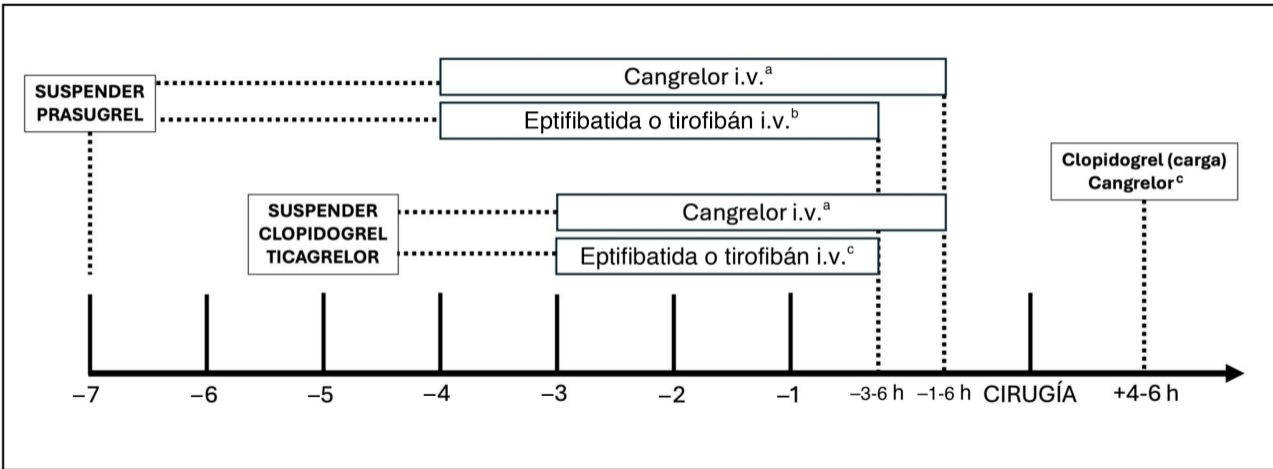

Supplement: mmc1 [file mmc1.pdf]
